# Supplementary material
Source: Springer Nature journal article supplement (https://www.springermedizin.de/resource/supplementary/12958_2010_763_MOESM3_ESM.pdf/9568434)

Total spermatozoa expelled ( $\times 10^3$ )

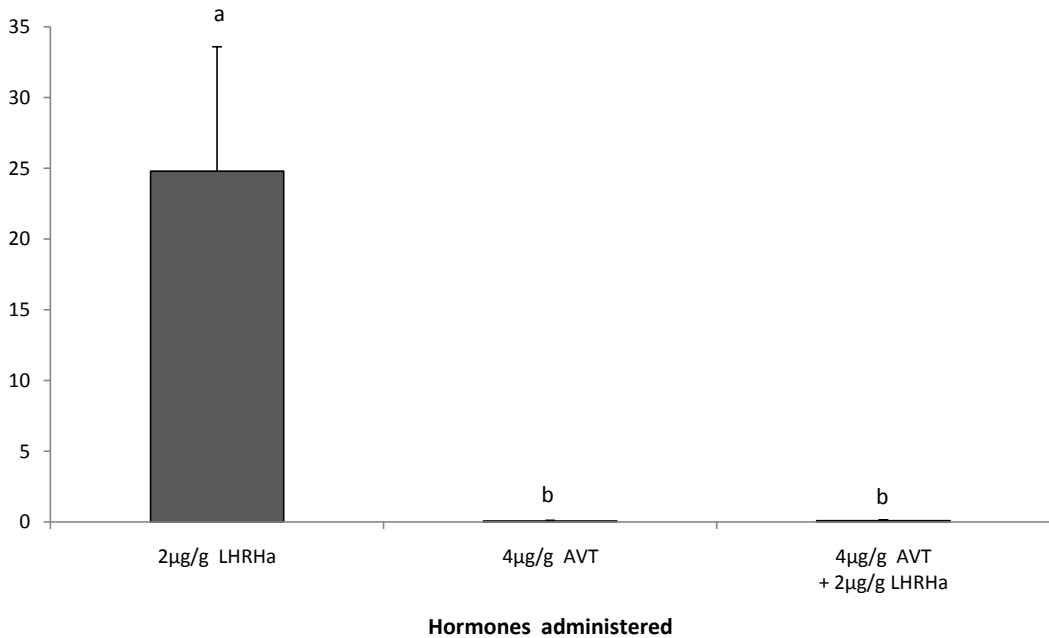

Supplement: MOESM3 [file 9568434]
